# Supplementary material
Source: PubMed Central journal article supplement (PMC3789564)
Supplement: supp_jit313_jit313supp_Table1.pdf [file supp_jit313_jit313supp_Table1.pdf]

Serotyping results in 114 ocular toxoplasmosis patients in Germany

| ID  | 6 I/II | 6 d-I/II | 6 II | 6 d-II | 7 II | SAG1 |
|-----|--------|----------|------|--------|------|------|
| 1   | 1.2    | 1.0      | 1.2  | 1.1    | 1.2  | 13.1 |
| 2   | 1.2    | 1.1      | 1.1  | 1.2    | 1.2  | 9.5  |
| 3   | 1.0    | 1.1      | 1.0  | 1.3    | 1.0  | 9.6  |
| 4   | 1.0    | 1.0      | 1.2  | 1.1    | 1.0  | 2.6  |
| 5   | 1.1    | 1.0      | 1.1  | 1.2    | 1.1  | 2.8  |
| 6   | 1.0    | 0.9      | 1.1  | 1.0    | 1.1  | 18.0 |
| 7   | 1.1    | 1.0      | 1.1  | 1.1    | 1.1  | 9.7  |
| 8   | 1.2    | 1.2      | 1.3  | 1.2    | 1.4  | 14.5 |
| 9   | 1.1    | 1.2      | 1.3  | 1.3    | 1.4  | 14.6 |
| 10  | 1.1    | 1.1      | 1.1  | 1.4    | 1.1  | 13.5 |
| 11  | 1.2    | 1.1      | 1.1  | 1.1    | 1.4  | 23.2 |
| 12  | 1.0    | 1.0      | 1.1  | 1.0    | 1.0  | 4.8  |
| 13  | 1.2    | 1.3      | 1.3  | 1.2    | 1.2  | 13.7 |
| 14  | 0.9    | 0.8      | 1.0  | 1.1    | 1.0  | 9.9  |
| 15  | 0.8    | 0.7      | 0.8  | 0.7    | 0.7  | 2.5  |
| 16  | 0.9    | 1.3      | 1.0  | 0.9    | 1.0  | 6.8  |
| 17  | 0.7    | 0.7      | 0.8  | 0.7    | 1.3  | 17.6 |
| 18  | 1.0    | 0.9      | 1.0  | 1.0    | 1.2  | 2.9  |
| 19  | 1.1    | 1.0      | 1.2  | 1.1    | 1.1  | 16.7 |
| 20  | 1.1    | 1.1      | 1.0  | 1.2    | 1.0  | 7.5  |
| 21  | 1.3    | 1.1      | 1.3  | 1.2    | 1.1  | 21.0 |
| 22  | 1.1    | 1.2      | 1.1  | 1.0    | 1.1  | 21.5 |
| 23  | 1.0    | 1.0      | 1.1  | 0.9    | 1.1  | 11.9 |
| 24  | 1.2    | 1.0      | 0.9  | 1.2    | 0.9  | 7.7  |
| 25  | 1.2    | 1.3      | 1.4  | 1.0    | 1.1  | 3.9  |
| 26  | 1.3    | 1.0      | 1.1  | 1.0    | 1.1  | 18.2 |
| 27  | 1.2    | 1.1      | 1.0  | 1.0    | 1.1  | 17.3 |
| 28  | 1.2    | 1.2      | 1.4  | 1.3    | 1.2  | 8.6  |
| 29  | 1.2    | 1.1      | 1.3  | 1.2    | 1.4  | 22.5 |
| 30  | 1.3    | 1.2      | 1.3  | 1.2    | 1.0  | 7.0  |
| 31  | 1.3    | 1.2      | 1.2  | 1.0    | 1.2  | 18.9 |
| 32  | 1.0    | 0.9      | 1.2  | 0.9    | 1.0  | 7.5  |
| 33  | 1.3    | 1.3      | 1.2  | 1.0    | 1.3  | 4.0  |
| 34  | 1.1    | 1.2      | 1.0  | 1.1    | 1.2  | 4.8  |
| 35  | 0.9    | 1.0      | 0.9  | 0.9    | 0.9  | 13.7 |
| 36  | 1.0    | 1.0      | 1.0  | 0.9    | 1.1  | 5.9  |
| 37  | 0.9    | 0.7      | 0.9  | 0.8    | 1.3  | 14.6 |
| 38  | 1.1    | 1.2      | 1.0  | 1.1    | 1.2  | 20.2 |
| 39  | 1.0    | 0.9      | 1.3  | 1.2    | 1.3  | 16.5 |
| 40  | 0.7    | 0.8      | 0.7  | 0.7    | 0.9  | 5.3  |
| 41  | 1.2    | 0.9      | 1.0  | 1.0    | 1.3  | 27.3 |
| 42  | 1.4    | 1.5      | 0.9  | 1.2    | 0.9  | 20.0 |
| 43  | 0.8    | 0.9      | 1.0  | 1.0    | 1.0  | 20.0 |
| 44  | 0.9    | 1.1      | 1.0  | 1.1    | 0.9  | 21.0 |
| 45  | 1.0    | 0.9      | 0.9  | 1.0    | 0.9  | 20.0 |
| 46  | 0.9    | 0.9      | 0.9  | 1.3    | 1.7  | 20.0 |
| 47  | 0.9    | 0.8      | 0.7  | 1.1    | 1.0  | 4.2  |
| 48  | 1.0    | 0.9      | 1.1  | 1.2    | 1.1  | 20.0 |
| 49  | 1.1    | 0.9      | 1.0  | 1.2    | 1.2  | 20.0 |
| 50  | 1.0    | 0.9      | 1.0  | 1.0    | 1.3  | 8.9  |
| 51  | 1.0    | 1.1      | 3.1  | 3.6    | 18.8 | 35.0 |
| 52  | 1.0    | 1.3      | 1.0  | 1.4    | 2.1  | 10.1 |
| 53  | 1.3    | 1.3      | 2.4  | 1.7    | 4.1  | 18.6 |
| 54  | 1.2    | 1.2      | 2.8  | 1.1    | 1.7  | 30.9 |
| 55  | 1.0    | 1.0      | 1.4  | 1.1    | 6.6  | 23.8 |
| 56  | 1.2    | 1.1      | 3.1  | 2.9    | 2.5  | 24.4 |
| 57  | 0.9    | 1.1      | 1.6  | 1.6    | 1.5  | 7.1  |
| 58  | 1.1    | 1.1      | 1.3  | 1.2    | 1.9  | 27.5 |
| 59  | 1.2    | 1.1      | 2.2  | 1.6    | 7.0  | 25.0 |
| 60  | 1.1    | 1.2      | 2.6  | 2.2    | 4.8  | 25.5 |
| 61  | 1.0    | 1.1      | 1.1  | 0.9    | 2.9  | 15.8 |
| 62  | 1.4    | 1.1      | 1.9  | 1.4    | 2.1  | 25.2 |
| 63  | 0.9    | 0.9      | 4.6  | 2.5    | 4.2  | 17.3 |
| 64  | 1.2    | 1.0      | 2.4  | 2.2    | 1.4  | 30.8 |
| 65  | 1.1    | 1.1      | 1.5  | 1.3    | 1.9  | 19.0 |
| 66  | 1.1    | 1.0      | 2.6  | 2.3    | 1.5  | 29.3 |
| 67  | 1.1    | 1.0      | 1.1  | 1.5    | 1.8  | 6.5  |
| 68  | 1.0    | 0.9      | 1.8  | 1.0    | 0.9  | 14.9 |
| 69  | 0.9    | 0.9      | 1.8  | 1.8    | 1.9  | 16.9 |
| 70  | 1.4    | 1.2      | 6.9  | 6.7    | 1.3  | 15.2 |
| 71  | 0.9    | 1.0      | 1.1  | 1.2    | 2.4  | 9.9  |
| 72  | 1.0    | 0.9      | 2.3  | 0.9    | 1.8  | 7.9  |
| 73  | 0.9    | 0.9      | 0.8  | 0.9    | 2.1  | 14.3 |
| 74  | 1.0    | 0.9      | 1.7  | 1.2    | 1.9  | 25.9 |
| 75  | 1.0    | 0.9      | 2.0  | 2.0    | 1.1  | 11.5 |
| 76  | 1.3    | 1.4      | 2.0  | 1.1    | 2.4  | 8.9  |
| 77  | 1.1    | 1.4      | 1.4  | 1.7    | 1.6  | 20.0 |
| 78  | 1.3    | 1.1      | 2.2  | 2.0    | 1.3  | 20.0 |
| 79  | 1.0    | 1.0      | 1.1  | 1.2    | 2.7  | 9.2  |
| 80  | 1.0    | 1.2      | 1.2  | 1.4    | 2.3  | 20.0 |
| 81  | 1.1    | 0.9      | 2.2  | 1.9    | 2.5  | 20.0 |
| 82  | 0.9    | 1.1      | 1.3  | 1.6    | 1.8  | 20.0 |
| 83  | 0.8    | 0.9      | 1.9  | 1.2    | 3.2  | 20.0 |
| 84  | 1.1    | 1.0      | 2.2  | 2.2    | 4.1  | 20.0 |
| 85  | 0.9    | 0.9      | 3.9  | 3.5    | 1.6  | 20.0 |
| 86  | 1.0    | 1.1      | 6.3  | 5.7    | 8.0  | 11.8 |
| 87  | 1.1    | 1.1      | 9.2  | 6.3    | 4.4  | 20.0 |
| 88  | 1.3    | 1.2      | 1.6  | 1.5    | 1.3  | 20.0 |
| 89  | 0.9    | 1.3      | 1.6  | 1.3    | 2.3  | 20.0 |
| 90  | 0.8    | 1.0      | 1.5  | 1.5    | 1.0  | 20.0 |
| 91  | 1.2    | 1.3      | 2.7  | 1.8    | 6.0  | 20.0 |
| 92  | 1.1    | 1.1      | 6.9  | 6.1    | 2.8  | 20.0 |
| 93  | 0.9    | 1.1      | 1.2  | 1.3    | 2.5  | 14.4 |
| 94  | 1.0    | 1.2      | 2.7  | 3.2    | 0.9  | 20.0 |
| 95  | 1.1    | 0.9      | 1.6  | 2.2    | 2.8  | 20.0 |
| 96  | 1.4    | 1.3      | 7.4  | 8.4    | 1.5  | 20.0 |
| 97  | 1.3    | 0.9      | 1.3  | 1.0    | 2.9  | 5.0  |
| 98  | 1.9    | 1.3      | 1.1  | 0.9    | 0.7  | 10.1 |
| 99  | 3.0    | 1.0      | 1.1  | 1.4    | 0.9  | 28.5 |
| 100 | 4.6    | 1.1      | 1.0  | 1.0    | 1.0  | 14.2 |
| 101 | 8.2    | 1.3      | 1.0  | 1.0    | 1.0  | 36.7 |
| 102 | 3.4    | 0.9      | 0.9  | 1.0    | 1.2  | 24.6 |
| 103 | 2.2    | 1.2      | 1.3  | 0.9    | 0.9  | 21.6 |
| 104 | 2.2    | 1.1      | 1.2  | 0.9    | 1.0  | 16.0 |
| 105 | 1.6    | 1.0      | 1.2  | 1.0    | 1.0  | 24.4 |
| 106 | 6.1    | 1.0      | 1.2  | 1.1    | 2.2  | 34.1 |
| 107 | 1.6    | 1.7      | 1.4  | 1.3    | 1.7  | 10.9 |
| 108 | 1.6    | 1.2      | 1.1  | 1.2    | 1.6  | 20.0 |
| 109 | 5.8    | 0.6      | 0.7  | 0.9    | 1.9  | 20.0 |
| 110 | 2.8    | 1.1      | 4.5  | 2.1    | 5.1  | 20.0 |
| 111 | 1.5    | 1.0      | 2.8  | 2.6    | 3.6  | 14.4 |
| 112 | 14.8   | 1.1      | 7.2  | 1.1    | 4.6  | 20.0 |
| 113 | 1.8    | 2.3      | 4.2  | 3.3    | 20.0 | 20.0 |
| 114 | 1.5    | 1.4      | 1.7  | 2.0    | 1.5  | 11.2 |

Non Reactive (NR)

44%

Type II

41%

Type I or III  
Atypical

7%

8%
