# Supplementary material
Source: PubMed Central journal article supplement (PMC3789564)
Supplement: supp_jit313_jit313supp_Table2.pdf [file supp_jit313_jit313supp_Table2.pdf]

**Serotyping results in 56 non OT patients in Germany**

|                 | ID | 6 I/III | 6 d-I/III | 6 II | 6 d-II | 7 II | SAG1 |            |
|-----------------|----|---------|-----------|------|--------|------|------|------------|
| <b>NR</b>       | 1  | 1.2     | 1.0       | 1.0  | 1.0    | 1.1  | 4.2  | <b>7%</b>  |
|                 | 2  | 1.0     | 0.9       | 0.9  | 0.9    | 0.9  | 5.6  |            |
|                 | 3  | 1.3     | 1.1       | 1.1  | 0.9    | 0.9  | 5.1  |            |
|                 | 4  | 1.4     | 1.3       | 1.3  | 1.3    | 1.1  | 11.2 |            |
| <b>Type II</b>  | 5  | 1.4     | 1.4       | 1.9  | 2.4    | 2.3  | 12.0 | <b>70%</b> |
|                 | 6  | 1.2     | 1.2       | 4.1  | 4.3    | 1.2  | 15.2 |            |
|                 | 7  | 1.4     | 1.0       | 2.2  | 2.7    | 3.8  | 13.3 |            |
|                 | 8  | 1.0     | 0.9       | 1.5  | 1.2    | 1.3  | 9.5  |            |
|                 | 9  | 1.2     | 1.0       | 1.6  | 1.2    | 2.1  | 9.6  |            |
|                 | 10 | 1.1     | 0.9       | 1.0  | 1.3    | 2.0  | 3.5  |            |
|                 | 11 | 1.3     | 1.1       | 1.7  | 1.5    | 1.2  | 9.8  |            |
|                 | 12 | 1.4     | 0.9       | 2.5  | 1.7    | 2.2  | 6.2  |            |
|                 | 13 | 1.0     | 1.0       | 1.8  | 1.6    | 1.5  | 3.2  |            |
|                 | 14 | 0.0     | 1.3       | 3.3  | 3.5    | 14.3 | 6.8  |            |
|                 | 15 | 1.1     | 1.1       | 1.6  | 1.6    | 2.3  | 4.5  |            |
|                 | 16 | 1.2     | 1.1       | 2.2  | 2.4    | 1.5  | 13.2 |            |
|                 | 17 | 0.7     | 1.2       | 1.0  | 1.3    | 1.6  | 8.6  |            |
|                 | 18 | 1.0     | 1.4       | 1.6  | 2.4    | 2.3  | 12.0 |            |
|                 | 19 | 1.3     | 0.9       | 1.3  | 1.8    | 1.5  | 12.7 |            |
|                 | 20 | 1.1     | 1.3       | 2.5  | 1.4    | 1.5  | 14.2 |            |
|                 | 21 | 1.4     | 1.0       | 2.3  | 2.0    | 1.8  | 14.5 |            |
|                 | 22 | 1.0     | 1.1       | 1.1  | 1.3    | 1.6  | 6.3  |            |
|                 | 23 | 1.4     | 1.1       | 1.9  | 2.2    | 1.4  | 2.5  |            |
|                 | 24 | 1.2     | 0.9       | 1.7  | 1.7    | 1.5  | 9.7  |            |
|                 | 25 | 1.1     | 1.2       | 1.4  | 1.4    | 2.5  | 7.5  |            |
|                 | 26 | 1.1     | 1.0       | 1.1  | 1.1    | 2.0  | 21.6 |            |
|                 | 27 | 1.4     | 1.0       | 1.9  | 1.3    | 1.6  | 1.5  |            |
|                 | 28 | 1.2     | 1.0       | 1.0  | 1.0    | 2.2  | 9.1  |            |
|                 | 29 | 1.1     | 0.9       | 1.0  | 1.1    | 1.9  | 12.6 |            |
|                 | 30 | 1.4     | 1.4       | 1.6  | 1.4    | 1.6  | 12.6 |            |
|                 | 31 | 1.2     | 1.2       | 1.2  | 1.2    | 7.9  | 13.0 |            |
|                 | 32 | 0.8     | 0.8       | 1.6  | 1.6    | 6.5  | 3.7  |            |
|                 | 33 | 1.0     | 0.9       | 1.3  | 1.3    | 2.2  | 15.7 |            |
|                 | 34 | 0.8     | 0.8       | 1.5  | 2.4    | 1.3  | 20.3 |            |
|                 | 35 | 1.0     | 0.9       | 1.0  | 2.0    | 4.0  | 10.4 |            |
|                 | 36 | 0.9     | 0.8       | 0.8  | 1.6    | 3.0  | 1.5  |            |
|                 | 37 | 0.9     | 0.9       | 1.1  | 1.2    | 1.5  | 3.3  |            |
|                 | 38 | 1.0     | 0.9       | 1.8  | 2.6    | 15.7 | 6.3  |            |
|                 | 39 | 1.4     | 1.3       | 2.3  | 1.3    | 3.0  | 17.5 |            |
|                 | 40 | 1.2     | 1.1       | 1.7  | 1.7    | 1.3  | 6.0  |            |
|                 | 41 | 1.1     | 1.0       | 1.1  | 2.5    | 1.5  | 1.1  |            |
|                 | 42 | 0.9     | 1.0       | 1.1  | 1.1    | 2.0  | 13.5 |            |
|                 | 43 | 1.1     | 1.1       | 1.2  | 1.2    | 1.7  | 2.5  |            |
| <b>I or III</b> | 44 | 3.1     | 1.1       | 1.0  | 1.0    | 1.3  | 22.9 | <b>11%</b> |
|                 | 45 | 2.1     | 1.2       | 1.1  | 1.2    | 0.8  | 6.0  |            |
|                 | 46 | 2.0     | 1.0       | 1.1  | 1.4    | 0.9  | 5.9  |            |
|                 | 47 | 1.7     | 1.2       | 1.1  | 1.1    | 1.0  | 13.4 |            |
|                 | 48 | 1.6     | 0.9       | 1.0  | 1.3    | 1.1  | 5.5  |            |
|                 | 49 | 1.7     | 1.6       | 1.2  | 1.3    | 1.4  | 8.0  |            |
| <b>Atypical</b> | 50 | 1.9     | 1.1       | 1.5  | 1.2    | 1.0  | 5.3  | <b>12%</b> |
|                 | 51 | 2.2     | 1.1       | 1.9  | 0.9    | 1.0  | 7.8  |            |
|                 | 52 | 2.1     | 1.5       | 4.2  | 1.3    | 6.5  | 3.1  |            |
|                 | 53 | 1.8     | 3.4       | 5.7  | 3.5    | 13.9 | 13.5 |            |
|                 | 54 | 3.1     | 4.3       | 3.7  | 4.3    | 3.1  | 2.5  |            |
|                 | 55 | 1.8     | 1.4       | 2.4  | 2.2    | 1.2  | 13.6 |            |
|                 | 56 | 3.7     | 1.1       | 1.2  | 1.2    | 2.1  | 25.1 |            |

Supplemental Table 2\_Shobab et. al.
